# Supplementary material for: The swine flu vaccine, public attitudes, and researcher interpretations: a systematic review of qualitative research
Source: Springer Nature journal article supplement (doi:10.1186/s12913-016-1466-7), 2016-06-24
Supplement: MOESM1 [file 10285756]

## Additional file 1: Search strategies

### Ovid Medline (9th Dec 2013)

|    |                                                                                                                      |
|----|----------------------------------------------------------------------------------------------------------------------|
| 1  | Immunization/                                                                                                        |
| 2  | Immunization Programs/                                                                                               |
| 3  | Immunization, Schedule/                                                                                              |
| 4  | Vaccination/                                                                                                         |
| 5  | Mass Vaccination/                                                                                                    |
| 6  | Vaccines/                                                                                                            |
| 7  | Influenza vaccines/                                                                                                  |
| 8  | (vaccine* or immuniz* or immunis*).ti,ab.                                                                            |
| 9  | or/1-8                                                                                                               |
| 10 | Influenza A Virus, H1N1 Subtype/                                                                                     |
| 11 | (swine flu or H1N1 or swine influenza).ti,ab.                                                                        |
| 12 | Or/10-11                                                                                                             |
| 13 | 9 and 12                                                                                                             |
| 14 | limit 13 to "qualitative (maximizes sensitivity)"                                                                    |
| 15 | Qualitative Research/ or Interviews as Topic/ or (qualitative or group discussion? or focus group? or themes).ti,ab. |
| 16 | 13 and 15                                                                                                            |
| 17 | 14 or 16                                                                                                             |
| 18 | limit 17 to (danish or english or spanish or norwegian or swedish)                                                   |
| 19 | (2009 or 2010 or 2011 or 2012 or 2013).yr.                                                                           |
| 20 | 18 and 19                                                                                                            |

### Search strategy used for Embase (16th Dec 2013)

|    |                                                                                             |
|----|---------------------------------------------------------------------------------------------|
| 1  | immunization/                                                                               |
| 2  | mass immunization/                                                                          |
| 3  | vaccination/                                                                                |
| 4  | revaccination/                                                                              |
| 5  | vaccine/                                                                                    |
| 6  | or/1-5                                                                                      |
| 7  | Influenza virus A H1N1/                                                                     |
| 8  | (swine flu or H1N1 or swine influenza).ti,ab.                                               |
| 9  | or/7-8                                                                                      |
| 10 | 6 and 9                                                                                     |
| 11 | Limit 10 to "qualitative (maximizes sensitivity)"                                           |
| 12 | qualitative research/ or interview/ or (group discussion? or focus group? or themes).ti,ab. |
| 13 | 10 and 12                                                                                   |
| 14 | 11 or 13                                                                                    |
| 15 | limit 14 to (danish or english or spanish or norwegian or swedish)                          |
| 16 | (2009 or 2010 or 2011 or 2012 or 2013).yr.                                                  |
| 17 | 15 and 16                                                                                   |
| 18 | limit 17 to embase                                                                          |

### Search strategy used for Cinahl (16th Dec 2013)

|    |                                                                                                                                                                                |
|----|--------------------------------------------------------------------------------------------------------------------------------------------------------------------------------|
| 1  | (MH "Immunization")                                                                                                                                                            |
| 2  | (MH "vaccines")                                                                                                                                                                |
| 3  | TI (immun* or vaccin*) OR AB (immune* or vaccin*)                                                                                                                              |
| 4  | 1 or 2 or 3                                                                                                                                                                    |
| 5  | (MH "Influenza A Virus, H1N1 Subtype")                                                                                                                                         |
| 6  | (MH "Influenza, Pandemic (H1N1)")                                                                                                                                              |
| 7  | TI (swine flu or swine influenza or h1n1) OR AB (swine flu or swine influenza or h1n1)                                                                                         |
| 8  | 5 or 6 or 7                                                                                                                                                                    |
| 9  | 4 and 8                                                                                                                                                                        |
| 10 | (MH "qualitative studies")                                                                                                                                                     |
| 11 | TI (qualitative research or interview or group discussion* or focus group* or themes) OR AB (qualitative research or interview or group discussion* or focus group* or themes) |
| 12 | 10 or 11                                                                                                                                                                       |
| 13 | 9 and 12                                                                                                                                                                       |
| 14 | Limit to articles published from 2009 to 2013                                                                                                                                  |
| 15 | Limit to articles published in academic journals                                                                                                                               |

### Search strategy used for Ovid Psycinfo (18th Dec 2013)

|   |                                                                                                                      |
|---|----------------------------------------------------------------------------------------------------------------------|
| 1 | Immunization/                                                                                                        |
| 2 | Vaccination/                                                                                                         |
| 3 | (vaccine* or immuniz* or immunis*).ti,ab.                                                                            |
| 4 | or/1-3                                                                                                               |
| 5 | (swine flu or H1N1 or swine influenza).ti,ab.                                                                        |
| 6 | 4 and 5                                                                                                              |
| 7 | Qualitative Research/ or Interviews as Topic/ or (qualitative or group discussion? or focus group? or themes).ti,ab. |
| 8 | 6 and 7                                                                                                              |

### Search strategy used for Science Citation (18th Dec 2013)

|    |                           |
|----|---------------------------|
| 1  | Immuniz*                  |
| 2  | Immunis*                  |
| 3  | Vaccin*                   |
| 4  | 1 or 2 or 3               |
| 5  | "swine flu"               |
| 6  | H1N1                      |
| 7  | 5 or 6                    |
| 8  | 4 and 7                   |
| 9  | "Qualitative Research"    |
| 10 | Interviews                |
| 11 | "group discussion"        |
| 12 | "focus group"             |
| 13 | themes                    |
| 14 | 9 or 10 or 11 or 12 or 13 |
| 15 | 8 and 14                  |
| 16 | Only 2009 - 2013          |
