# Supplementary material for: The swine flu vaccine, public attitudes, and researcher interpretations: a systematic review of qualitative research
Source: Springer Nature journal article supplement (doi:10.1186/s12913-016-1466-7), 2016-06-24
Supplement: MOESM2 [file 10285756]

| Author year       | Is the context clearly described? | Is there evidence of researcher reflexivity? | Is the sampling strategy clearly described and appropriate? | Is the method of data collection clearly described and appropriate for the research question? | Is the method of data analysis clearly described and appropriate for the research question? | Are the claims made supported by sufficient evidence? |
|-------------------|-----------------------------------|----------------------------------------------|-------------------------------------------------------------|-----------------------------------------------------------------------------------------------|---------------------------------------------------------------------------------------------|-------------------------------------------------------|
| Bjorkman 2013     | Partly                            | No                                           | Yes                                                         | Yes                                                                                           | Yes                                                                                         | Partly                                                |
| Boerner 2013      | Partly                            | No                                           | Yes                                                         | Partly                                                                                        | Partly                                                                                      | Partly                                                |
| Boyd 2013         | Partly                            | No                                           | Yes                                                         | Yes                                                                                           | Yes                                                                                         | Partly                                                |
| Caress 2010       | Yes                               | No                                           | Partly                                                      | Partly                                                                                        | Partly                                                                                      | Partly                                                |
| Cassady 2012      | Partly                            | No                                           | Partly                                                      | Yes                                                                                           | Yes                                                                                         | Partly                                                |
| D'Alessandro 2012 | Partly                            | No                                           | Partly                                                      | Partly                                                                                        | Partly                                                                                      | No                                                    |
| Driedger 2013     | Yes                               | No                                           | Yes                                                         | Yes                                                                                           | Yes                                                                                         | Yes                                                   |
| Henrich 2012      | Partly                            | No                                           | Partly                                                      | Yes                                                                                           | Yes                                                                                         | Yes                                                   |
| Hidiroglu 2010    | Partly                            | No                                           | Partly                                                      | Partly                                                                                        | Partly                                                                                      | No                                                    |
| Hilton 2010       | Yes                               | No                                           | Yes                                                         | Yes                                                                                           | Yes                                                                                         | Yes                                                   |
| Lynch 2012        | No                                | No                                           | Partly                                                      | Yes                                                                                           | Partly                                                                                      | Partly                                                |
| Oria, 2011        | Partly                            | No                                           | Partly                                                      | Partly                                                                                        | Partly                                                                                      | Yes                                                   |
| Rodriguez, 2009   | Partly                            | No                                           | Yes                                                         | Partly                                                                                        | Partly                                                                                      | Yes                                                   |
| Sim 2011          | Yes                               | No                                           | Partly                                                      | Yes                                                                                           | Yes                                                                                         | Yes                                                   |
| Siu 2012          | Partly                            | No                                           | Yes                                                         | Yes                                                                                           | Yes                                                                                         | Partly                                                |
| Teasdale, 2011    | No                                | No                                           | Yes                                                         | Yes                                                                                           | Yes                                                                                         | Partly                                                |
